# Supplementary material
Source: PubMed Central journal article supplement (PMC3378627)
Supplement: NIHMS40452-supplement-01.pdf [file NIHMS40452-supplement-01.pdf]

| <b>Gene</b> | <b>Primers</b>                                                  |
|-------------|-----------------------------------------------------------------|
| Cdc42       | F:TGGATACAAAACCTATTTTCAGCAATGC<br>R:GTAGGATATCAGGAGACATGTTTTACC |
| Deltex-1    | F:AAGAAGTTCACCGCAAGAGGATT<br>R:CTAGGTAGCTAGCGTCCGGGTAG          |
| GAPDH       | F:GTGAAGGTCGGAGTCAACG<br>R:TGAGGTCAATGAAGGGGTC                  |
| Rac1        | F:ACACTTGCTCTCCTATGTAGTTCTC<br>R: TCACTCCATTACAGTACAATGTTATGTC  |
| Rac2        | F:GCAAGACCTGCCTTCTCATCA<br>R:GCTGTCCACCATCACATTGG               |
| Rac3        | F:GTACATCCCCACCGTTTTTG<br>R:GGCTCACCAGAGAGAAGCAG                |
| RhoA        | F:CAACTATGATTATTAACGATGTCCAACC<br>R:TGGTGTGTCAGGTGGGAGTG        |
| RhoB        | F:CCCACCGTCTTCGAGAATA<br>R:CACCGAGAAGCACATGAGAA                 |
| RhoC        | F:ACCTGCCTCCTCATCGTCTTC<br>R:CACCTGCTTGCCGTCCAC                 |
| RhoD        | F:GTGAATCATTCTGCAAGAAGG<br>R:GCTTGTTACCCAGTGATTTG               |
| RhoF        | F:GTCTATCTGGTAGTGGGTAAAC<br>R:AGGATACAGTGGTGCCTATC              |
| RhoG        | F:TGGGAACACTGGGTATTCTCATG<br>R: CACCACAATAGGCAGCAACAAC          |
| RhoH        | F:GAGAAGTAACATTCTGCAAATCGC<br>R:AGCACACGCCATTCAGCAAG            |
| RhoQ/TC10   | F:TGTGAAAGAGGAGTGGGTAC<br>R:TAAAGTTTTGGGGTCATCTCG               |
| RhoU/Wrch1  | F:AAATGGGTGCCGGAGATTCG<br>R:CCAACTCAATGAGGACTTTGACATC           |
| RhoV/Chp    | F:GTCAGTCACCTCCGAGCAGTTTG<br>R:CCCTCCATAATGCCAAGCGTTCC          |
| RhoBTB1     | F:GCAAGCAGTATTGGATTATCTC<br>R:TGGTCAACTCCTGAACGG                |
| RhoBTB2     | F:GAGGGACCCCTGACATTTAC<br>R:CATTAAACGGGACACCACTACATG            |
| Rnd1        | F:CTATCCAGAGACCTATGTGCC<br>R:CGGACATTATCGTAGTAGGGAG             |
| Rnd2        | F:TCCTGATTCTGATGCTGTGCTC<br>R:ATTGGGGCAGAACTCTTGAGTC            |

Supplementary Table 1. List of qPCR primers. F, forward; R, reverse.
